# Supplementary material for: Non-targeted Screening of Natural Products from 288 Fungal Endophytes from Canadian Fruit Crops
Source: PubMed Central journal article supplement (PMC10339433; doi:10.1021/acsomega.3c02786), 2023-06-27
Supplement: ao3c02786_si_001.pdf [file ao3c02786_si_001.pdf]

## **Non-targeted screening of natural products from 288 fungal endophytes from Canadian fruit crops**

**Natasha DesRochers<sup>1,2</sup>, Justin B. Renaud<sup>1</sup>, Joey B. Tanney<sup>3</sup>, Ashraf Ibrahim<sup>4</sup>, Ken K.-C. Yeung<sup>2,5</sup>, Mark W. Sumarah<sup>1,2\*</sup>**

<sup>1</sup> London Research and Development Centre, Agriculture and Agri-Food Canada, 1391 Sandford St., London, Ontario, Canada, N5V4T3

<sup>2</sup> Department of Chemistry, University of Western Ontario, 1151 Richmond St., London, Ontario, Canada, N6A 3K7

<sup>3</sup> Natural Resources Canada, Pacific Forestry Centre, 506 Burnside Road, Victoria, British Columbia, Canada, V8Z 1M5

<sup>4</sup> McMaster University, 1290 Main St. W, Hamilton, Ontario, Canada, L8S 4L8

<sup>5</sup> Department of Biochemistry, University of Western Ontario, 1151 Richmond St., London, Ontario, Canada, N6A 3K7

\* Correspondence: mark.sumarah@agr.gc.ca; Tel.: +01-226-688-6187

Supplementary Materials:

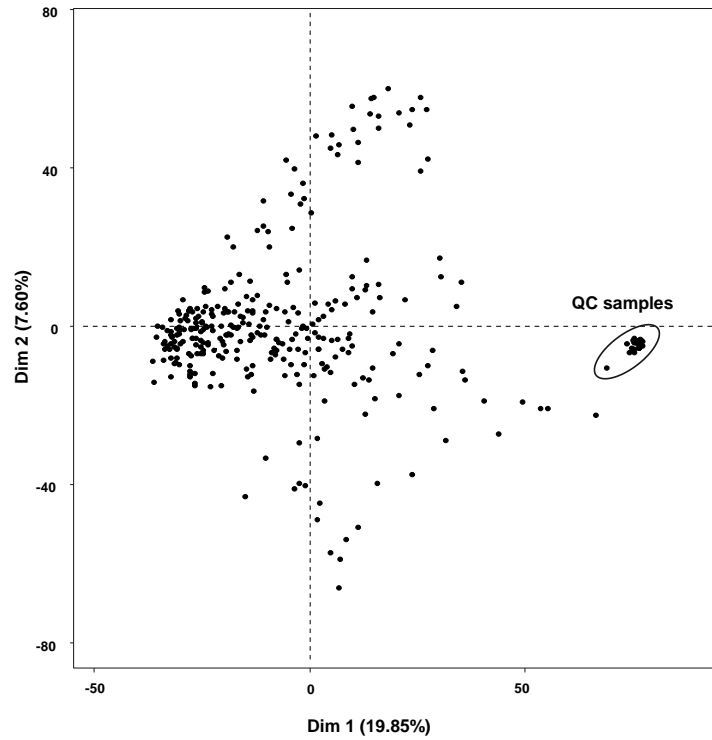

**Figure S1.** PCA plot of endophyte extracts and QC samples in positive ionization mode.

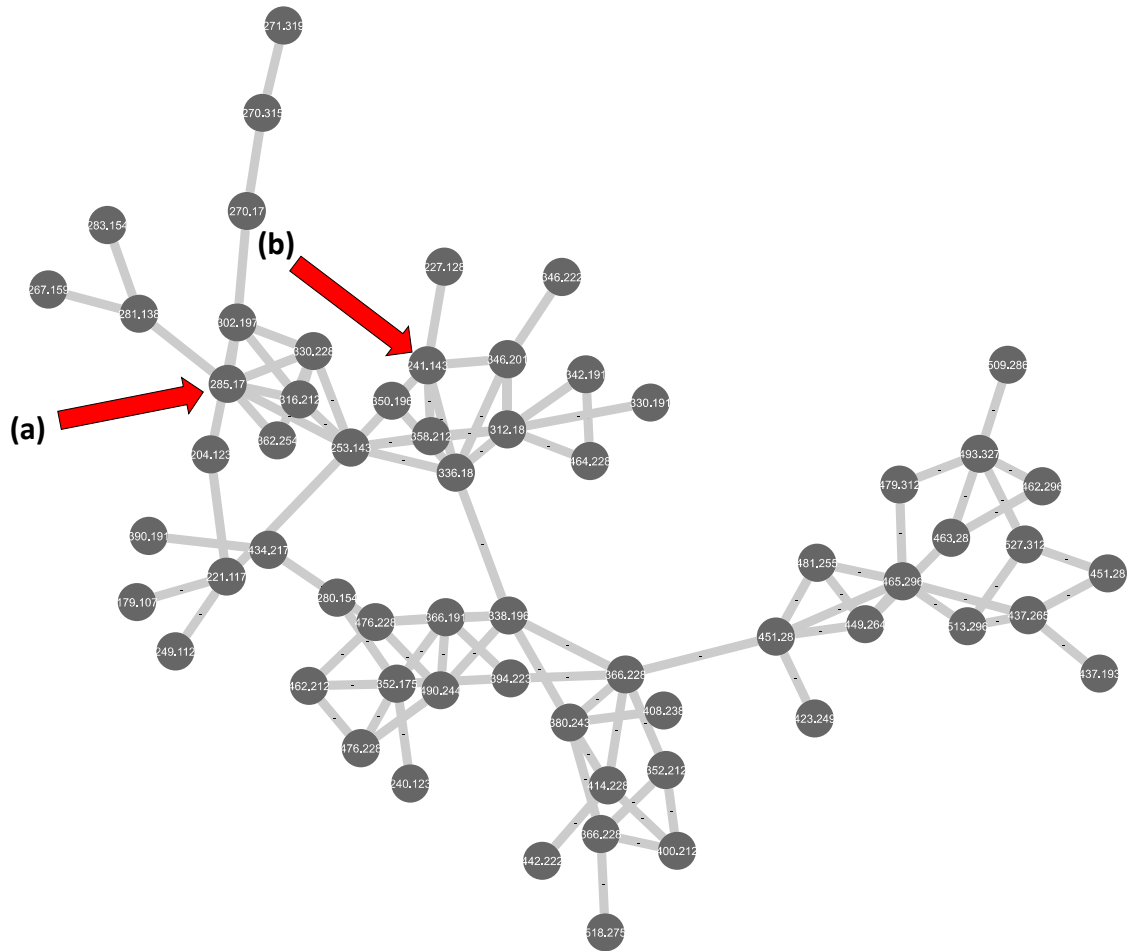

**Figure S2.** Enlarged version of unknown cluster U1 pictured in Figure 1.

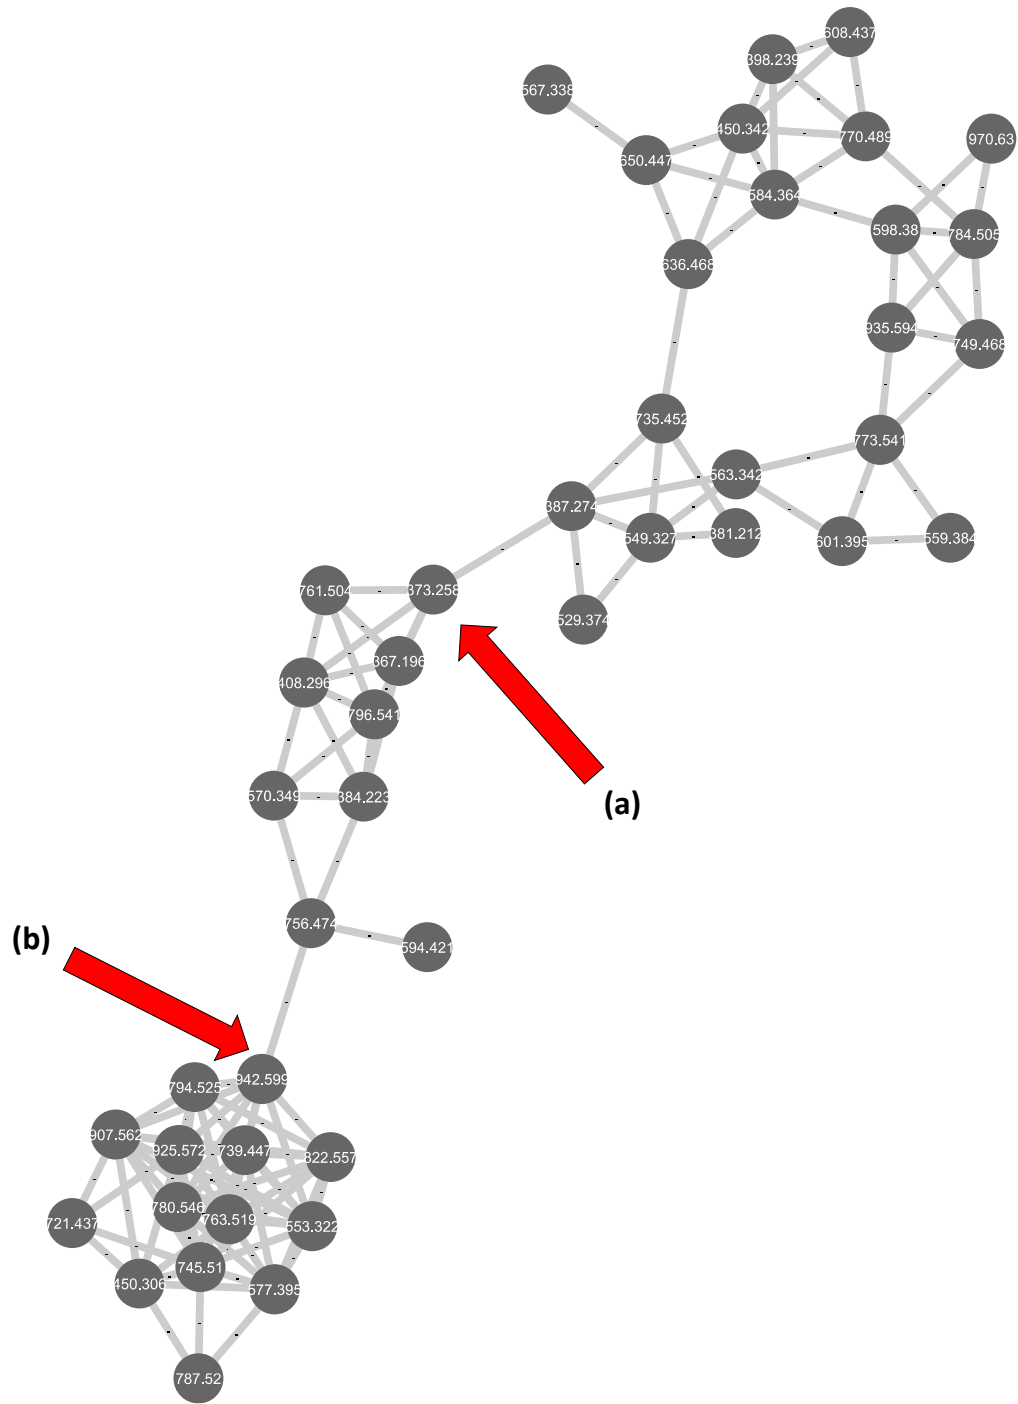

**Figure S3.** Enlarged version of unknown cluster U2 pictured in Figure 1.

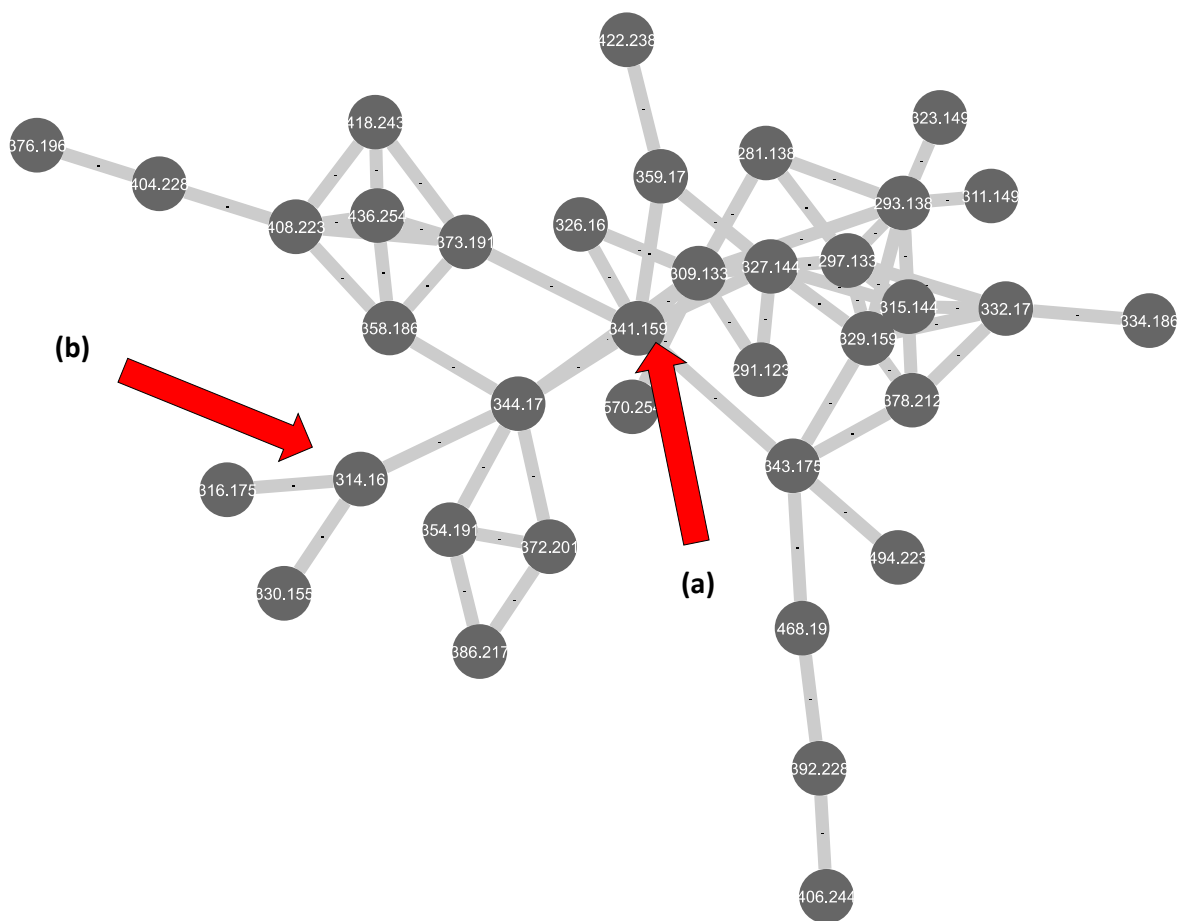

**Figure S4.** Enlarged version of unknown cluster U3 pictured in Figure 1.

**Table S1.** List of endophyte isolates used for GNPS analysis, with tentative species identification based on ITS sequencing, geographic origin, and host organism listed where available.

| <b>Endophyte ID</b> | <b>Tentative species ID</b>             | <b>Origin</b>  | <b>Host Organism</b> |
|---------------------|-----------------------------------------|----------------|----------------------|
| E-002               | <i>Epicoccum nigrum</i>                 | Bala, ON       | Cranberry            |
| E-003               | <i>Setomelanomma holmii</i>             | Bala, ON       | Cranberry            |
| E-004               | <i>Botrytis cinerea</i>                 | Bala, ON       | Cranberry            |
| E-005               | <i>Epicoccum nigrum</i>                 | Bala, ON       | Cranberry            |
| E-006               | <i>Nigrospora sphaerica</i>             | Bala, ON       | Cranberry            |
| E-007               | <i>Articulospora atra</i>               | Bala, ON       | Cranberry            |
| E-008               | <i>Nemania serpens</i>                  | Bala, ON       | Cranberry            |
| E-009               | <i>Venturia</i> sp.                     | Bala, ON       | Cranberry            |
| E-010               | <i>Venturia</i> sp.                     | Bala, ON       | Cranberry            |
| E-011               | <i>Seimatosporium lichenicola</i>       | Debert, NS     | Lowbush blueberry    |
| E-012               | Dothideaceae sp.                        | Debert, NS     | Lowbush blueberry    |
| E-015               | <i>Paramycosphaerella</i> sp.           | Portapique, NS | Lowbush blueberry    |
| E-016               | <i>Didymella</i> sp.                    | Portapique, NS | Lowbush blueberry    |
| E-017               | <i>Alpinaria</i> cf. <i>rhododendri</i> | Portapique, NS | Lowbush blueberry    |
| E-018               | <i>Chaetopsis</i> sp.                   | Portapique, NS | Lowbush blueberry    |
| E-019               | <i>Alpinaria</i> cf. <i>rhododendri</i> | Portapique, NS | Lowbush blueberry    |
| E-020               | <i>Phyllosticta vaccinii</i>            | Portapique, NS | Lowbush blueberry    |
| E-021               | Dothideaceae sp.                        | Portapique, NS | Lowbush blueberry    |
| E-022               | Dothideaceae sp.                        | Mt. Thom, NS   | Lowbush blueberry    |
| E-023               | Dothideaceae sp.                        | Mt. Thom, NS   | Lowbush blueberry    |
| E-024               | <i>Leptodontidium</i> sp.               | Mt. Thom, NS   | Lowbush blueberry    |
| E-025               | Dothideaceae sp.                        | Mt. Thom, NS   | Lowbush blueberry    |
| E-026               | <i>Coniochaeta</i> cf. <i>marina</i>    | Mt. Thom, NS   | Lowbush blueberry    |
| E-027               | Dothideaceae sp.                        | Mt. Thom, NS   | Lowbush blueberry    |
| E-028               | <i>Xylaria ellisii</i>                  | Mt. Thom, NS   | Lowbush blueberry    |
| E-029               | Dothideaceae sp.                        | Mt. Thom, NS   | Lowbush blueberry    |
| E-030               | <i>Phialocephala</i> sp.                | Mt. Thom, NS   | Lowbush blueberry    |
| E-031               | <i>Phialocephala</i> sp.                | Mt. Thom, NS   | Lowbush blueberry    |
| E-032               | <i>Godronia</i> cf. <i>cassandrae</i>   | Mt. Thom, NS   | Lowbush blueberry    |
| E-033               | Dothideaceae sp.                        | Bala, ON       | Cranberry            |
| E-036               | <i>Godronia</i> cf. <i>cassandrae</i>   | Mt. Thom, NS   | Lowbush blueberry    |

| <b>Endophyte ID</b> | <b>Tentative species ID</b>       | <b>Origin</b>            | <b>Host Organism</b> |
|---------------------|-----------------------------------|--------------------------|----------------------|
| E-038               | Dothideaceae sp.                  | Bala, ON                 | Cranberry            |
| E-039               | <i>Mollisia cf. melaleuca</i>     | Mt. Thom, NS             | Lowbush blueberry    |
| E-040               | <i>Mollisia cf. nigrescens</i>    | Simcoe, ON               | Highbush blueberry   |
| E-041               | <i>Casaresia cf. sphagnum</i>     | Mt. Thom, NS             | Lowbush blueberry    |
| E-042               | <i>Pyrenopeziza sp.</i>           | Portapique, NS           | Lowbush blueberry    |
| E-043               | <i>Lachnum sp.</i>                | Simcoe, ON               | Highbush blueberry   |
| E-044               | <i>Phialocephala sp.</i>          | Mt. Thom, NS             | Lowbush blueberry    |
| E-045               | <i>Godronia cassandrae</i>        | Mt. Thom, NS             | Lowbush blueberry    |
| E-046               | <i>Godronia cassandrae</i>        | Portapique, NS           | Lowbush blueberry    |
| E-047               | <i>Paramycosphaerella sp.</i>     | Portapique, ON           | Lowbush blueberry    |
| E-048               | <i>Discosia rubi</i>              | Parks Blueberries,<br>ON | Highbush blueberry   |
| E-049               | <i>Phyllosticta pyrolae</i>       | Mt. Thom, NS             | Lowbush blueberry    |
| E-050               | <i>Nemania serpens</i>            | Simcoe, ON               | Highbush blueberry   |
| E-051               | <i>Coniochaeta cf. marina</i>     | Portapique, ON           | Lowbush blueberry    |
| E-052               | <i>Paramycosphaerella sp.</i>     | Portapique, ON           | Lowbush blueberry    |
| E-053               | <i>Leptodontidium sp.</i>         | Mt. Thom, NS             | Lowbush blueberry    |
| E-054               | <i>Phyllosticta vaccinii</i>      | P.E.I.                   | Lowbush blueberry    |
| E-055               | Dothideaceae sp.                  | Bala, ON                 | Cranberry            |
| E-056               | Dothideaceae sp.                  | Bala, ON                 | Cranberry            |
| E-058               | <i>Kretzschmaria hedjaroudei</i>  | Jordan Station, ON       | Grape                |
| E-059               | <i>Setomelanomma holmii</i>       | Bala, ON                 | Cranberry            |
| E-060               | Dothideaceae sp.                  | Mt. Thom, NS             | Lowbush blueberry    |
| E-062               | <i>Diaporthe phaseolorum</i>      | Simcoe, ON               | Highbush blueberry   |
| E-063               | <i>Mollisia cf. melaleuca</i>     | Portapique, NS           | Lowbush blueberry    |
| E-064               | Barbatosphaeriaceae sp.           | Jordan Station, ON       | Highbush blueberry   |
| E-065               | <i>Seimatosporium lichenicola</i> | Jordan Station, ON       | Highbush blueberry   |
| E-066               | <i>Didymella pomorum</i>          | Parks Blueberries,<br>ON | Highbush blueberry   |
| E-067               | <i>Geastrumia polystigmatis</i>   | Mt. Thom, NS             | Lowbush blueberry    |
| E-068               | <i>Articulospora atra</i>         | Bala, ON                 | Cranberry            |
| E-069               | Dothideaceae sp.                  | Debert, NS               | Lowbush blueberry    |
| E-070               | Dothideaceae sp.                  | Debert, NS               | Lowbush blueberry    |
| E-072               | <i>Mollisia cf. melaleuca</i>     | Bala, ON                 | Cranberry            |

| <b>Endophyte ID</b> | <b>Tentative species ID</b>           | <b>Origin</b>      | <b>Host Organism</b> |
|---------------------|---------------------------------------|--------------------|----------------------|
| E-073               | <i>Sphaerulina vaccinii</i>           | Debert, NS         | Lowbush blueberry    |
| E-075               | <i>Xylaria corniformis</i>            | Jordan Station, ON | Grape                |
| E-076               | <i>Lachnum</i> sp.                    | Bala, ON           | Cranberry            |
| E-077               | <i>Lophiotrema mucilaginosus</i>      | Debert, NS         | Lowbush blueberry    |
| E-079               | <i>Neovaginatispora</i> sp.           | Mt. Thom, NS       | Lowbush blueberry    |
| E-081               | Dothideaceae sp.                      | Debert, NS         | Lowbush blueberry    |
| E-082               | <i>Hypomontagnella submonticulosa</i> | Jordan Station, ON | Raspberry            |
| E-083               | Rhytismataceae sp.                    | Portapique, NS     | Lowbush blueberry    |
| E-084               | <i>Hypomontagnella submonticulosa</i> | Jordan Station, ON | Pear                 |
| E-086               | <i>Godronia cassandrae</i>            | Portapique, NS     | Lowbush blueberry    |
| E-087               | <i>Coniochaeta</i> cf. <i>marina</i>  | Portapique, NS     | Lowbush blueberry    |
| E-088               | <i>Phyllosticta pyrolae</i>           | Mt. Thom, NS       | Lowbush blueberry    |
| E-089               | <i>Godronia cassandrae</i>            | Portapique, NS     | Lowbush blueberry    |
| E-090               | Hyaloscyphaceae sp.                   | Portapique, NS     | Lowbush blueberry    |
| E-091               | <i>Sphaerulina vaccinii</i>           | Portapique, NS     | Lowbush blueberry    |
| E-092               | <i>Trichaptum abietinum</i>           | Debert, NS         | Lowbush blueberry    |
| E-093               | <i>Phaeomoniellales</i> sp.           | Bala, ON           | Cranberry            |
| E-094               | <i>Godronia cassandrae</i>            | Debert, NS         | Lowbush blueberry    |
| E-095               | <i>Leptodontidium</i> sp.             | Mt. Thom, NS       | Lowbush blueberry    |
| E-096               | <i>Leptodontidium</i> sp.             | Portapique, NS     | Lowbush blueberry    |
| E-097               | <i>Microdochium neoqueenslandicum</i> | Rawdon, NS         | Lowbush blueberry    |
| E-099               | <i>Pseudoplectania nigrella</i>       | Jordan Station, ON | Grape                |
| E-100               | <i>Mollisia</i> cf. <i>nigrescens</i> | Mt. Thom, NS       | Lowbush blueberry    |
| E-101               | <i>Creosphaeria sassafras</i>         | Jordan Station, ON | Grape                |
| E-102               | <i>Leptodontidium</i> sp.             | Portapique, NS     | Lowbush blueberry    |
| E-103               | <i>Nemania serpens</i>                | Rawdon, NS         | Highbush blueberry   |
| E-104               | <i>Xylaria ellisii</i>                | Rawdon, NS         | Highbush blueberry   |
| E-105               | <i>Godronia cassandrae</i>            | Mt. Thom, NS       | Lowbush blueberry    |
| E-106               | Tympanidaceae sp.                     | Mt. Thom, NS       | Lowbush blueberry    |
| E-107               | <i>Xylaria ellisii</i>                | Mt. Thom, NS       | Lowbush blueberry    |
| E-108               | <i>Leptodontidium</i> sp.             | Mt. Thom, NS       | Lowbush blueberry    |



| <b>Endophyte ID</b> | <b>Tentative species ID</b>      | <b>Origin</b>      | <b>Host Organism</b> |
|---------------------|----------------------------------|--------------------|----------------------|
| E-109               | <i>Mollisia cf. melaleuca</i>    | Mt. Thom, NS       | Lowbush blueberry    |
| E-110               | Tympanidaceae sp.                | Mt. Thom, NS       | Lowbush blueberry    |
| E-111               | <i>Hypoderma cf. rubi</i>        | Debert, NS         | Lowbush blueberry    |
| E-112               | <i>Xylaria ellisii</i>           | Mt. Thom, NS       | Lowbush blueberry    |
| E-113               | <i>Leptodontidium</i> sp.        | Mt. Thom, NS       | Lowbush blueberry    |
| E-114               | <i>Xylaria ellisii</i>           | Debert, NS         | Lowbush blueberry    |
| E-115               | <i>Xylaria ellisii</i>           | Rawdon, NS         | Highbush blueberry   |
| E-116               | <i>Xylaria ellisii</i>           | Portapique, NS     | Lowbush blueberry    |
| E-117               | <i>Pilidium concavum</i>         | Portapique, NS     | Lowbush blueberry    |
| E-118               | <i>Pilidium concavum</i>         | Portapique, NS     | Lowbush blueberry    |
| E-119               | <i>Mollisia cf. melaleuca</i>    | Debert, NS         | Lowbush blueberry    |
| E-120               | Dothideaceae sp.                 | Portapique, NS     | Lowbush blueberry    |
| E-121               | PCR unsuccessful                 | Portapique, NS     | Lowbush blueberry    |
| E-122               | <i>Alternaria alternata</i>      | Mt. Thom, NS       | Lowbush blueberry    |
| E-123               | <i>Xylaria ellisii</i>           | Rawdon, NS         | Highbush blueberry   |
| E-124               | <i>Mollisia cf. nigrescens</i>   | Portapique, NS     | Lowbush blueberry    |
| E-125               | <i>Alternaria arborescens</i>    | Jordan Station, ON | Raspberry            |
| E-129               | <i>Xylaria ellisii</i>           | Portapique, NS     | Lowbush blueberry    |
| E-130               | <i>Hypoderma cf. rubi</i>        | Debert, NS         | Lowbush blueberry    |
| E-133               | Neodevriesiaceae sp.             | Mt. Thom, NS       | Lowbush blueberry    |
| E-135               | <i>Sphaerulina vaccinii</i>      | Mt. Thom, NS       | Lowbush blueberry    |
| E-138               | <i>Xylaria ellisii</i>           | Rawdon, NS         | Highbush blueberry   |
| E-140               | <i>Nemania serpens</i>           | Jordan Station, ON | Grape                |
| E-141               | Dothideaceae sp.                 | Mt. Thom, NS       | Lowbush blueberry    |
| E-142               | <i>Xylaria ellisii</i>           | Portapique, NS     | Lowbush blueberry    |
| E-143               | <i>Xylaria ellisii</i>           | Portapique, NS     | Lowbush blueberry    |
| E-144               | <i>Alpinaria cf. rhododendri</i> | Rawdon, NS         | Highbush blueberry   |
| E-145               | <i>Alternaria arborescens</i>    | Jordan Station, ON | Raspberry            |
| E-148               | <i>Nemania</i> sp.               | Jordan Station, ON | Grape                |
| E-150               | <i>Xylaria ellisii</i>           | Mt. Thom, NS       | Lowbush blueberry    |
| E-152               | Dothideaceae sp.                 | Portapique, NS     | Lowbush blueberry    |
| E-153               | <i>Xylaria ellisii</i>           | Portapique, NS     | Lowbush blueberry    |
| E-154               | <i>Mollisia cf. nigrescens</i>   | Portapique, NS     | Lowbush blueberry    |
| E-155               | <i>Leptodontidium</i> sp.        | Portapique, NS     | Lowbush blueberry    |

| <b>Endophyte ID</b> | <b>Tentative species ID</b>                  | <b>Origin</b>      | <b>Host Organism</b> |
|---------------------|----------------------------------------------|--------------------|----------------------|
| E-156               | <i>Nemania diffusa</i>                       | Jordan Station, ON | Highbush blueberry   |
| E-157               | <i>Xylaria ellisii</i>                       | Portapique, NS     | Lowbush blueberry    |
| E-158               | Dothideaceae sp.                             | Portapique, NS     | Lowbush blueberry    |
| E-159               | <i>Nemania</i> sp.                           | Portapique, NS     | Lowbush blueberry    |
| E-160               | <i>Seimatosporium lichenicola</i>            | Portapique, NS     | Lowbush blueberry    |
| E-161               | Dothideaceae sp.                             | Portapique, NS     | Lowbush blueberry    |
| E-162               | <i>Xylaria ellisii</i>                       | Rawdon, NS         | Highbush blueberry   |
| E-163               | <i>Aureobasidium</i> cf. <i>subglaciale</i>  | Rawdon, NS         | Highbush blueberry   |
| E-164               | <i>Xylaria ellisii</i>                       | Debert, NS         | Lowbush blueberry    |
| E-165               | <i>Phaeoacremonium fraxinopennsylvanicum</i> | Rawdon, NS         | Highbush blueberry   |
| E-167               | <i>Xylaria ellisii</i>                       | Debert, NS         | Lowbush blueberry    |
| E-168               | <i>Mollisia</i> cf. <i>melaleuca</i>         | Debert, NS         | Lowbush blueberry    |
| E-169               | <i>Alternaria arborescens</i>                | Jordan Station, ON | Raspberry            |
| E-170               | <i>Xylaria ellisii</i>                       | Mt. Thom, NS       | Lowbush blueberry    |
| E-171               | <i>Alternaria infectoria</i>                 | Jordan Station, ON | Highbush blueberry   |
| E-172               | <i>Anthostomella</i> sp.                     | Jordan Station, ON | Grape                |
| E-173               | <i>Nemania serpens</i>                       | Jordan Station, ON | Raspberry            |
| E-174               | <i>Diaporthe vaccinii</i>                    | Mt. Thom, NS       | Blueberry            |
| E-175               | <i>Phyllosticta</i> cf. <i>pyrolae</i>       | Debert, NS         | Blueberry            |
| E-177               | <i>Paraphaeosphaeria neglecta</i>            | Mt. Thom, NS       | Blueberry            |
| E-178               | <i>Fusarium tricinctum</i>                   | Mt. Thom, NS       | Blueberry            |
| E-179               | <i>Sphaerulina vaccinii</i>                  | Debert, NS         | Blueberry            |
| E-180               | <i>Diaporthe vaccinii</i>                    | Debert, NS         | Blueberry            |
| E-181               | <i>Epicoccum nigrum</i>                      | Debert, NS         | Blueberry            |
| E-182               | <i>Paraphaeosphaeria neglecta</i>            | Mt. Thom, NS       | Blueberry            |
| E-183               | <i>Godronia cassandrae</i>                   | Portapique, NS     | Blueberry            |
| E-184               | <i>Xylaria cubensis</i>                      | Simcoe, ON         | Grape                |
| E-188               | Dothideaceae sp.                             | Mt. Thom, NS       | Blueberry            |
| E-189               | <i>Paraphaeosphaeria neglecta</i>            | Mt. Thom, NS       | Blueberry            |
| E-190               | <i>Sphaerulina vaccinii</i>                  | Mt. Thom, NS       | Blueberry            |
| E-191               | Dothideaceae sp.                             | Mt. Thom, NS       | Blueberry            |
| E-192               | <i>Sphaerulina vaccinii</i>                  | Mt. Thom, NS       | Blueberry            |
| E-193               | Dothideaceae sp.                             | Mt. Thom, NS       | Blueberry            |

| <b>Endophyte ID</b> | <b>Tentative species ID</b>       | <b>Origin</b>      | <b>Host Organism</b> |
|---------------------|-----------------------------------|--------------------|----------------------|
| E-194               | <i>Nemania serpens</i>            | Jordan Station, ON | Grape                |
| E-196               | <i>Mollisia cf. nigrescens</i>    | Portapique, NS     | Blueberry            |
| E-197               | <i>Cryptosporella</i> sp.         | Portapique, NS     | Blueberry            |
| E-198               | <i>Diaporthe vaccinii</i>         | Mt. Thom, NS       | Blueberry            |
| E-199               | <i>Kretzschmaria hedjaroudei</i>  | Jordan Station, ON | Blueberry            |
| E-200               | <i>Fusarium tricinctum</i>        | Mt. Thom, NS       | Blueberry            |
| E-201               | Tympanidaceae sp.                 | Debert, NS         | Blueberry            |
| E-202               | <i>Nemania serpens</i>            | Jordan Station, ON | Grape                |
| E-203               | <i>Coniothyrium ferrarisianum</i> | Jordan Station, ON | Grape                |
| E-204               | <i>Phyllosticta cf. pyrolae</i>   | Mt. Thom, NS       | Blueberry            |
| E-205               | <i>Godronia cassandrae</i>        | Mt. Thom, NS       | Blueberry            |
| E-206               | <i>Xylaria ellisii</i>            | Portapique, NS     | Blueberry            |
| E-207               | <i>Seimatosporium lichenicola</i> | New Brunswick, CA  | Blueberry            |
| E-208               | <i>Xylaria ellisii</i>            | New Brunswick, CA  | Blueberry            |
| E-209               | <i>Godronia cassandrae</i>        | New Brunswick, CA  | Blueberry            |
| E-210               | <i>Godronia cassandrae</i>        | New Brunswick, CA  | Blueberry            |
| E-211               | <i>Godronia cassandrae</i>        | New Brunswick, CA  | Blueberry            |
| E-212               | <i>Hypoderma cf. rubi</i>         | New Brunswick, CA  | Blueberry            |
| E-213               | <i>Godronia cassandrae</i>        | New Brunswick, CA  | Blueberry            |
| E-214               | <i>Hypoderma cf. rubi</i>         | New Brunswick, CA  | Blueberry            |
| E-215               | <i>Ramularia</i> sp.              | New Brunswick, CA  | Blueberry            |
| E-216               | <i>Xylaria ellisii</i>            | New Brunswick, CA  | Blueberry            |
| E-217               | <i>Mollisia cf. nigrescens</i>    | Portapique, NS     | Blueberry            |
| E-218               | <i>Mollisia</i> sp.               | New Brunswick, CA  | Blueberry            |
| E-219               | <i>Stemphylium globuliferum</i>   | Debert, NS         | Blueberry            |
| E-220               | <i>Camaropella</i> sp.            | Jordan Station, ON | Grape                |
| E-221               | <i>Leptodontidium</i> sp.         | Portapique, NS     | Blueberry            |
| E-222               | <i>Pleosporales</i> sp.           | Mt. Thom, NS       | Blueberry            |
| E-223               | <i>Nemania serpens</i>            | Debert, NS         | Blueberry            |
| E-224               | <i>Paraphaeosphaeria neglecta</i> | Mt. Thom, NS       | Blueberry            |
| E-226               | <i>Xylaria ellisii</i>            | New Brunswick, CA  | Blueberry            |
| E-227               | <i>Hypoderma cf. rubi</i>         | New Brunswick, CA  | Blueberry            |
| E-228               | <i>Paraphaeosphaeria neglecta</i> | Debert, NS         | Blueberry            |
| E-229               | <i>Diaporthe vaccinii</i>         | Portapique, NS     | Blueberry            |

| <b>Endophyte ID</b> | <b>Tentative species ID</b>           | <b>Origin</b>      | <b>Host Organism</b> |
|---------------------|---------------------------------------|--------------------|----------------------|
| E-231               | Tympanidaceae sp.                     | Mt. Thom, NS       | Blueberry            |
| E-232               | <i>Epicoleosporium ramularioides</i>  | Mt. Thom, NS       | Blueberry            |
| E-233               | <i>Seimatosporium lichenicola</i>     | New Brunswick, CA  | Blueberry            |
| E-234               | PCR unsuccessful                      | New Brunswick, CA  | Blueberry            |
| E-235               | <i>Seimatosporium lichenicola</i>     | Portapique, NS     | Blueberry            |
| E-236               | <i>Creosphaeria sassafras</i>         | Jordan Station, ON | Grape                |
| E-237               | <i>Colletotrichum cf. truncatum</i>   | Mt. Thom, NS       | Blueberry            |
| E-238               | <i>Hypoderma cf. rubi</i>             | New Brunswick, CA  | Blueberry            |
| E-239               | <i>Hypoderma cf. rubi</i>             | New Brunswick, CA  | Blueberry            |
| E-240               | Tympanidaceae sp.                     | New Brunswick, CA  | Blueberry            |
| E-241               | <i>Xylaria ellisii</i>                | New Brunswick, CA  | Blueberry            |
| E-242               | PCR unsuccessful                      | New Brunswick, CA  | Blueberry            |
| E-243               | <i>Xylaria ellisii</i>                | Mt. Thom, NS       | Blueberry            |
| E-244               | <i>Xylaria ellisii</i>                | Mt. Thom, NS       | Blueberry            |
| E-245               | <i>Godronia cassandrae</i>            | Mt. Thom, NS       | Blueberry            |
| E-246               | <i>Godronia cassandrae</i>            | Mt. Thom, NS       | Blueberry            |
| E-247               | Tympanidaceae sp.                     | Mt. Thom, NS       | Blueberry            |
| E-248               | <i>Ramularia</i> sp.                  | New Brunswick, CA  | Blueberry            |
| E-249               | Xylariaceae sp.                       | Jordan Station, ON | Blueberry            |
| E-250               | <i>Hypomontagnella submonticulosa</i> | Jordan Station, ON | Grape                |
| E-251               | <i>Hypomontagnella submonticulosa</i> | Jordan Station, ON | Raspberry            |
| E-252               | <i>Ramularia</i> sp.                  | New Brunswick, CA  | Blueberry            |
| E-253               | <i>Ramularia</i> sp.                  | New Brunswick, CA  | Blueberry            |
| E-254               | PCR unsuccessful                      | New Brunswick, CA  | Blueberry            |
| E-255               | Tympanidaceae sp.                     | New Brunswick, CA  | Blueberry            |
| E-256               | <i>Phyllosticta cf. pyrolae</i>       | Mt. Thom, NS       | Blueberry            |
| E-257               | <i>Ramularia</i> sp.                  | New Brunswick, CA  | Blueberry            |
| E-258               | <i>Godronia cassandrae</i>            | New Brunswick, CA  | Blueberry            |
| E-259               | <i>Fusarium tricinctum</i>            | New Brunswick, CA  | Blueberry            |
| E-260               | <i>Sphaerulina vaccinii</i>           | Portapique, NS     | Blueberry            |
| E-261               | <i>Nigrospora sphaerica</i>           | Simcoe, ON         | Raspberry            |

| <b>Endophyte ID</b> | <b>Tentative species ID</b>                       | <b>Origin</b>      | <b>Host Organism</b> |
|---------------------|---------------------------------------------------|--------------------|----------------------|
| E-262               | <i>Colletotrichum fioriniae</i>                   | New Brunswick, CA  | Blueberry            |
| E-263               | <i>Paraphaeosphaeria neglecta</i>                 | Mt. Thom, NS       | Blueberry            |
| E-300               | <i>Aposphaeria corallinolutea</i>                 | AAFC Kentville, NS | Blueberry            |
| E-301               | <i>Nemania serpens</i>                            | AAFC Kentville, NS | Blueberry            |
| E-303               | <i>Xylaria ellisii</i>                            | AAFC Kentville, NS | Blueberry            |
| E-304               | <i>Neocucurbitaria</i> sp.                        | AAFC Kentville, NS | Blueberry            |
| E-305               | <i>Neocucurbitaria</i> sp.                        | AAFC Kentville, NS | Blueberry            |
| E-306               | <i>Pseudoplectania nigrella</i>                   | AAFC Kentville, NS | Blueberry            |
| E-307               | PCR unsuccessful                                  | AAFC Kentville, NS | Blueberry            |
| E-308               | <i>Aspergillus amstelodami</i>                    | AAFC Kentville, NS | Blueberry            |
| E-309               | PCR unsuccessful                                  | AAFC Kentville, NS | Blueberry            |
| E-310               | <i>Cladosporium</i> cf.<br><i>cladosporioides</i> | AAFC Kentville, NS | Blueberry            |
| E-312               | <i>Neocucurbitaria</i> sp.                        | AAFC Kentville, NS | Blueberry            |
| E-313               | <i>Neocucurbitaria</i> sp.                        | AAFC Kentville, NS | Blueberry            |
| E-314               | <i>Neocucurbitaria</i> sp.                        | AAFC Kentville, NS | Blueberry            |
| E-316               | <i>Pseudoplectania nigrella</i>                   | AAFC Kentville, NS | Blueberry            |
| E-317               | <i>Xylaria ellisii</i>                            | AAFC Kentville, NS | Blueberry            |
| E-319               | <i>Paraphaeosphaeria neglecta</i>                 | Debert, NS         | Lowbush blueberry    |
| E-320               | <i>Paraphaeosphaeria neglecta</i>                 | Debert, NS         | Lowbush blueberry    |
| E-321               | <i>Neocucurbitaria</i> sp.                        | Debert, NS         | Lowbush blueberry    |
| E-322               | <i>Paraphaeosphaeria neglecta</i>                 | Debert, NS         | Lowbush blueberry    |
| E-323               | <i>Neocucurbitaria</i> sp.                        | AAFC Kentville, NS | Blueberry            |
| E-324               | <i>Proliferodiscus</i> sp.                        | AAFC Kentville, NS | Blueberry            |
| E-326               | <i>Proliferodiscus</i> sp.                        | AAFC Kentville, NS | Blueberry            |
| E-327               | <i>Penicillium camponotum</i>                     | AAFC Kentville, NS | Blueberry            |
| E-330               | <i>Proliferodiscus</i> sp.                        | AAFC Kentville, NS | Blueberry            |
| E-331               | <i>Proliferodiscus</i> sp.                        | AAFC Kentville, NS | Blueberry            |
| E-332               | <i>Proliferodiscus</i> sp.                        | AAFC Kentville, NS | Blueberry            |
| E-333               | <i>Neocucurbitaria</i> sp.                        | AAFC Kentville, NS | Blueberry            |
| E-334               | <i>Gloeophyllum sepiarium</i>                     | Mt. Thom, NS       | Lowbush blueberry    |
| E-335               | <i>Cladosporium allicinum</i>                     | Debert, NS         | Lowbush blueberry    |
| E-336               | <i>Plagiostoma petiophilum</i>                    | Mt. Thom, NS       | Lowbush blueberry    |
| E-337               | <i>Cytospora ribis</i>                            | Debert, NS         | Lowbush blueberry    |

| <b>Endophyte ID</b> | <b>Tentative species ID</b>            | <b>Origin</b>      | <b>Host Organism</b> |
|---------------------|----------------------------------------|--------------------|----------------------|
| E-338               | <i>Thyronectria cucurbitula</i>        | Kempton, NS        | Lowbush blueberry    |
| E-339               | <i>Neocucurbitaria</i> sp.             | Debert, NS         | Lowbush blueberry    |
| E-340               | <i>Leptodontidium</i> sp.              | Debert, NS         | Lowbush blueberry    |
| E-341               | <i>Leptodontidium</i> sp.              | Debert, NS         | Lowbush blueberry    |
| E-342               | <i>Trichaptum abietinum</i>            | Kempton, NS        | Lowbush blueberry    |
| E-343               | <i>Lachnellula calyciformis</i>        | Kempton, NS        | Lowbush blueberry    |
| E-344               | <i>Pseudoplectania nigrella</i>        | Debert, NS         | Lowbush blueberry    |
| E-346               | <i>Hypomontagnella submonticulosa</i>  | AAFC Kentville, NS | Blueberry            |
| E-347               | <i>Xylaria ellisii</i>                 | AAFC Kentville, NS | Blueberry            |
| E-349               | <i>Trichaptum abietinum</i>            | AAFC Kentville, NS | Blueberry            |
| E-350               | <i>Lachnellula calyciformis</i>        | Kempton, NS        | Lowbush blueberry    |
| E-351               | <i>Sarea difformis</i>                 | Mt. Thom, NS       | Lowbush blueberry    |
| E-352               | <i>Seimatosporium lichenicola</i>      | AAFC Kentville, NS | Blueberry            |
| E-353               | <i>Proliferodiscus</i> sp.             | AAFC Kentville, NS | Blueberry            |
| E-354               | <i>Xylaria ellisii</i>                 | AAFC Kentville, NS | Blueberry            |
| E-356               | <i>Neocucurbitaria</i> sp.             | AAFC Kentville, NS | Blueberry            |
| E-357               | <i>Seimatosporium lichenicola</i>      | AAFC Kentville, NS | Blueberry            |
| E-360               | <i>Botrytis cinerea</i>                | Mt. Thom, NS       | Lowbush blueberry    |
| E-361               | <i>Proliferodiscus</i> sp.             | AAFC Kentville, NS | Blueberry            |
| E-362               | <i>Aposphaeria corallinolutea</i>      | AAFC Kentville, NS | Blueberry            |
| E-363               | <i>Proliferodiscus</i> sp.             | AAFC Kentville, NS | Blueberry            |
| E-366               | <i>Neocucurbitaria</i> sp.             | AAFC Kentville, NS | Blueberry            |
| E-367               | <i>Nemania</i> sp.                     | AAFC Kentville, NS | Blueberry            |
| E-368               | <i>Cytospora</i> cf. <i>cedri</i>      | AAFC Kentville, NS | Blueberry            |
| E-369               | <i>Neocucurbitaria</i> sp.             | AAFC Kentville, NS | Blueberry            |
| E-370               | <i>Alternaria</i> cf. <i>alternata</i> | AAFC Kentville, NS | Blueberry            |
| E-372               | <i>Seimatosporium lichenicola</i>      | AAFC Kentville, NS | Blueberry            |
| E-373               | <i>Neocucurbitaria</i> sp.             | Debert, NS         | Lowbush blueberry    |
| E-375               | <i>Xylaria ellisii</i>                 | AAFC Kentville, NS | Blueberry            |

**Table S2.** Natural products dereplicated from molecular network of Canadian fungal endophytes. Formulas listed do not include adducts.

| Cluster | Compound                                                                                                                                                                                                    | Measured $m/z$                             | Formula                                                       | RT (min) | Mass error ( $\Delta$ ppm) | Major producers            |
|---------|-------------------------------------------------------------------------------------------------------------------------------------------------------------------------------------------------------------|--------------------------------------------|---------------------------------------------------------------|----------|----------------------------|----------------------------|
| A       | Hormonemate F                                                                                                                                                                                               | 626.3747 [M+NH <sub>4</sub> ] <sup>+</sup> | C <sub>29</sub> H <sub>52</sub> O <sub>13</sub>               | 4.36     | 0.116                      | Dothideaceae sp.           |
|         | Hormonemate A/E                                                                                                                                                                                             | 740.4426 [M+NH <sub>4</sub> ] <sup>+</sup> | C <sub>35</sub> H <sub>62</sub> O <sub>15</sub>               | 4.75     | -0.171                     | Dothideaceae sp.           |
|         | Hormonemate <sup>a</sup>                                                                                                                                                                                    | 770.4531 [M+NH <sub>4</sub> ] <sup>+</sup> | C <sub>36</sub> H <sub>64</sub> O <sub>16</sub>               | 4.64     | -0.170                     | Dothideaceae sp.           |
|         | [3-methyl-1-[3-methyl-1-[3-methyl-1-[3-methyl-1-oxo-1-(2,3,4,5,6-pentahydroxyhexoxy)pentan-2-yl]oxy-1-oxopentan-2-yl]oxy-1-oxopentan-2-yl]oxy-1-oxopentan-2-yl] 2-acetyloxy-3-methylpentanoate <sup>a</sup> | 812.4634 [M+NH <sub>4</sub> ] <sup>+</sup> | C <sub>38</sub> H <sub>66</sub> O <sub>17</sub>               | 4.83     | -0.711                     | Dothideaceae sp.           |
| B       | Phenochalasin C                                                                                                                                                                                             | 450.2639 [M+H] <sup>+</sup>                | C <sub>28</sub> H <sub>35</sub> NO <sub>4</sub>               | 4.15     | -0.145                     | <i>Xylaria ellisii</i>     |
|         | Cytochalasin Z26/Z22/Z23                                                                                                                                                                                    | 480.2382 [M+H] <sup>+</sup>                | C <sub>28</sub> H <sub>33</sub> NO <sub>6</sub>               | 3.72     | 0.199                      | <i>Xylaria ellisii</i>     |
|         | Zygosporin E                                                                                                                                                                                                | 492.2744 [M+H] <sup>+</sup>                | C <sub>30</sub> H <sub>37</sub> NO <sub>5</sub>               | 4.37     | 0.244                      | <i>Xylaria ellisii</i>     |
|         | Epoxychochalsin C/D                                                                                                                                                                                         | 524.2645 [M+H] <sup>+</sup>                | C <sub>30</sub> H <sub>37</sub> NO <sub>7</sub>               | 3.53     | 0.479                      | <i>Xylaria ellisii</i>     |
|         | Epoxychochalsin N/R                                                                                                                                                                                         | 540.2593 [M+H] <sup>+</sup>                | C <sub>30</sub> H <sub>37</sub> NO <sub>8</sub>               | 3.75     | 0.160                      | <i>Xylaria ellisii</i>     |
|         | Cytochalasin P1                                                                                                                                                                                             | 542.2749 [M+H] <sup>+</sup>                | C <sub>30</sub> H <sub>39</sub> NO <sub>8</sub>               | 3.54     | -0.007                     | <i>Xylaria ellisii</i>     |
| C       | Enniatin B3/J1                                                                                                                                                                                              | 629.4120 [M+NH <sub>4</sub> ] <sup>+</sup> | C <sub>31</sub> H <sub>53</sub> N <sub>3</sub> O <sub>9</sub> | 4.84     | 0.070                      | <i>Fusarium tricinctum</i> |
|         | Enniatin B2/J2/K                                                                                                                                                                                            | 643.4276 [M+NH <sub>4</sub> ] <sup>+</sup> | C <sub>32</sub> H <sub>55</sub> N <sub>3</sub> O <sub>9</sub> | 4.91     | 0.224                      | <i>Fusarium tricinctum</i> |
|         | Enniatin B                                                                                                                                                                                                  | 657.4443 [M+NH <sub>4</sub> ] <sup>+</sup> | C <sub>33</sub> H <sub>57</sub> N <sub>3</sub> O <sub>9</sub> | 4.95     | 1.010                      | <i>Fusarium tricinctum</i> |

| Cluster | Compound                         | Measured $m/z$                             | Formula                                                        | RT (min) | Mass error ( $\Delta$ ppm) | Major producers                   |
|---------|----------------------------------|--------------------------------------------|----------------------------------------------------------------|----------|----------------------------|-----------------------------------|
|         | Enniatin P1                      | 659.4223 [M+NH <sub>4</sub> ] <sup>+</sup> | C <sub>32</sub> H <sub>55</sub> N <sub>3</sub> O <sub>10</sub> | 4.55     | -0.410                     | <i>Fusarium tricinctum</i>        |
|         | Enniatin P2                      | 673.4382 [M+NH <sub>4</sub> ] <sup>+</sup> | C <sub>33</sub> H <sub>57</sub> N <sub>3</sub> O <sub>10</sub> | 4.68     | -0.075                     | <i>Fusarium tricinctum</i>        |
|         | Enniatin A1/E1/E2/G/O2           | 685.4746 [M+NH <sub>4</sub> ] <sup>+</sup> | C <sub>35</sub> H <sub>61</sub> N <sub>3</sub> O <sub>9</sub>  | 5.24     | 0.269                      | <i>Fusarium tricinctum</i>        |
|         | Enniatin A/A2/C/F/MK1688         | 699.4902 [M+NH <sub>4</sub> ] <sup>+</sup> | C <sub>36</sub> H <sub>63</sub> N <sub>3</sub> O <sub>9</sub>  | 5.32     | -0.209                     | <i>Fusarium tricinctum</i>        |
|         | Enniatin M1/M2                   | 701.4698 [M+NH <sub>4</sub> ] <sup>+</sup> | C <sub>35</sub> H <sub>61</sub> N <sub>3</sub> O <sub>10</sub> | 4.86     | 0.470                      | <i>Fusarium tricinctum</i>        |
| D       | Lovastatin <sup>a</sup>          | 405.2631 [M+H] <sup>+</sup>                | C <sub>24</sub> H <sub>36</sub> O <sub>5</sub>                 | 4.50     | -1.211                     | <i>Seimatosporium lichenicola</i> |
|         | Simvastatin <sup>a</sup>         | 419.2793 [M+H] <sup>+</sup>                | C <sub>25</sub> H <sub>38</sub> O <sub>5</sub>                 | 4.74     | -0.073                     | <i>Seimatosporium lichenicola</i> |
|         | Lovastatin analogue <sup>a</sup> | 482.3110 [M+NH <sub>4</sub> ] <sup>+</sup> | C <sub>26</sub> H <sub>40</sub> O <sub>7</sub>                 | 4.07     | -0.392                     | <i>Seimatosporium lichenicola</i> |
| E       | Ellisiamide D                    | 522.3649 [M+H] <sup>+</sup>                | C <sub>27</sub> H <sub>47</sub> N <sub>5</sub> O <sub>5</sub>  | 4.28     | -0.012                     | <i>Xylaria ellisii</i>            |
|         | Cyclic pentapeptide 2            | 536.3804 [M+H] <sup>+</sup>                | C <sub>28</sub> H <sub>49</sub> N <sub>5</sub> O <sub>5</sub>  | 4.36     | -0.515                     | <i>Xylaria ellisii</i>            |
|         | Xylarotide A                     | 550.3968 [M+H] <sup>+</sup>                | C <sub>29</sub> H <sub>51</sub> N <sub>5</sub> O <sub>5</sub>  | 4.51     | 0.225                      | <i>Xylaria ellisii</i>            |
|         | Ellisiamide A                    | 556.3494 [M+H] <sup>+</sup>                | C <sub>30</sub> H <sub>45</sub> N <sub>5</sub> O <sub>5</sub>  | 4.65     | 0.043                      | <i>Xylaria ellisii</i>            |
|         | Ellisiamide B                    | 570.3649 [M+H] <sup>+</sup>                | C <sub>31</sub> H <sub>47</sub> N <sub>5</sub> O <sub>5</sub>  | 4.71     | -0.116                     | <i>Xylaria ellisii</i>            |
|         | Cyclic pentapeptide 1            | 584.3807 [M+H] <sup>+</sup>                | C <sub>32</sub> H <sub>49</sub> N <sub>5</sub> O <sub>5</sub>  | 4.66     | 0.161                      | <i>Xylaria ellisii</i>            |
|         | Ellisiamide C                    | 598.3961 [M+H] <sup>+</sup>                | C <sub>33</sub> H <sub>51</sub> N <sub>5</sub> O <sub>5</sub>  | 4.76     | -0.294                     | <i>Xylaria ellisii</i>            |
|         | Ellisiamide G                    | 600.3754 [M+H] <sup>+</sup>                | C <sub>32</sub> H <sub>49</sub> N <sub>5</sub> O <sub>6</sub>  | 4.14     | -0.218                     | <i>Xylaria ellisii</i>            |
| F       | Demethylsambutoxin               | 440.2793 [M+H] <sup>+</sup>                | C <sub>27</sub> H <sub>37</sub> NO <sub>4</sub>                | 4.85     | -0.534                     | <i>Fusarium tricinctum</i>        |
|         | Sambutoxin                       | 454.2952 [M+H] <sup>+</sup>                | C <sub>28</sub> H <sub>39</sub> NO <sub>4</sub>                | 5.08     | -0.033                     | <i>Fusarium tricinctum</i>        |
|         | Anhydrooxysporidinone            | 472.3059 [M+H] <sup>+</sup>                | C <sub>28</sub> H <sub>41</sub> NO <sub>5</sub>                | 4.81     | 0.403                      | <i>Fusarium tricinctum</i>        |
|         | Oxysporidinone <sup>a</sup>      | 490.3162 [M+H] <sup>+</sup>                | C <sub>28</sub> H <sub>43</sub> NO <sub>6</sub>                | 4.73     | -0.132                     | <i>Fusarium tricinctum</i>        |



| Cluster | Compound                                                                                                                                                                                                   | Measured $m/z$                             | Formula                                          | RT (min) | Mass error ( $\Delta$ ppm) | Major producers                                |
|---------|------------------------------------------------------------------------------------------------------------------------------------------------------------------------------------------------------------|--------------------------------------------|--------------------------------------------------|----------|----------------------------|------------------------------------------------|
| G       | Trypethelone                                                                                                                                                                                               | 273.1120 [M+H] <sup>+</sup>                | C <sub>16</sub> H <sub>16</sub> O <sub>4</sub>   | 4.05     | -0.496                     | <i>Godronia cassandrae</i>                     |
|         | Sclerodin                                                                                                                                                                                                  | 329.1019 [M+H] <sup>+</sup>                | C <sub>18</sub> H <sub>16</sub> O <sub>6</sub>   | 4.51     | -0.288                     | <i>Godronia cassandrae</i>                     |
|         | Sclerodinol                                                                                                                                                                                                | 345.0969 [M+H] <sup>+</sup>                | C <sub>18</sub> H <sub>16</sub> O <sub>7</sub>   | 4.30     | 0.292                      | <i>Godronia cassandrae</i>                     |
| H       | [3-methyl-1-[3-methyl-1-[3-methyl-1-[3-methyl-1-oxo-1-(2,3,4,5-tetrahydroxypentoxo)pentan-2-yl]oxy-1-oxopentan-2-yl]oxy-1-oxopentan-2-yl]oxy-1-oxopentan-2-yl] 2-acetyloxy-3-methylpentanoate <sup>a</sup> | 782.4527 [M+NH <sub>4</sub> ] <sup>+</sup> | C <sub>37</sub> H <sub>64</sub> O <sub>16</sub>  | 5.03     | -0.641                     | Dothideaceae sp.                               |
| I       | Coleophomone intermediate                                                                                                                                                                                  | 469.1857 [M+H] <sup>+</sup>                | C <sub>26</sub> H <sub>28</sub> O <sub>8</sub>   | 3.79     | 0.076                      | <i>Xylaria cubensis</i>                        |
| J       | (E)-4-(6,8-dihydroxy-3-methyl-1-oxoisochromen-7-yl)-2-methoxybut-3-enoic acid <sup>a</sup>                                                                                                                 | 307.0812 [M+H] <sup>+</sup>                | C <sub>15</sub> H <sub>14</sub> O <sub>7</sub>   | 3.52     | -0.258                     | <i>Ramularia, Epicoccum, and Mollisia</i> spp. |
| K       | Cytochalasin D                                                                                                                                                                                             | 508.2696 [M+H] <sup>+</sup>                | C <sub>30</sub> H <sub>37</sub> NO <sub>6</sub>  | 4.05     | -0.427                     | <i>Xylaria ellisii</i>                         |
| L       | Griseophenone C                                                                                                                                                                                            | 305.1019 [M+H] <sup>+</sup>                | C <sub>16</sub> H <sub>16</sub> O <sub>6</sub>   | 3.41     | -0.212                     | <i>Xylaria ellisii</i>                         |
|         | Dechlorogriseofulvin <sup>a</sup>                                                                                                                                                                          | 319.1179 [M+H] <sup>+</sup>                | C <sub>17</sub> H <sub>18</sub> O <sub>6</sub>   | 4.06     | 1.144                      | <i>Xylaria ellisii</i>                         |
|         | Griseofulvin <sup>a</sup>                                                                                                                                                                                  | 353.0786 [M+H] <sup>+</sup>                | C <sub>17</sub> H <sub>17</sub> ClO <sub>6</sub> | 4.01     | 0.078                      | <i>Xylaria ellisii</i>                         |
| M       | (E)-5-(4-methoxy-5-methyl-6-oxopyran-2-yl)-                                                                                                                                                                | 267.1226 [M+H] <sup>+</sup>                | C <sub>14</sub> H <sub>18</sub> O <sub>5</sub>   | 3.57     | -0.300                     | <i>Seimatosporium lichenicola</i>              |

| Cluster | Compound                                                         | Measured $m/z$              | Formula                                                        | RT (min) | Mass error ( $\Delta$ ppm) | Major producers                                        |
|---------|------------------------------------------------------------------|-----------------------------|----------------------------------------------------------------|----------|----------------------------|--------------------------------------------------------|
|         | 3-methylhex-4-enoic acid <sup>a</sup> (similar to marinopyrones) |                             |                                                                |          |                            |                                                        |
| N       | Senkyunolide H <sup>a</sup>                                      | 225.1122 [M+H] <sup>+</sup> | C <sub>12</sub> H <sub>16</sub> O <sub>4</sub>                 | 3.60     | 0.153                      | <i>Nigrospora sphaerica</i> and <i>Cytospora ribis</i> |
| O       | Trichodin A analogue <sup>a</sup>                                | 354.2063 [M+H] <sup>+</sup> | C <sub>22</sub> H <sub>27</sub> NO <sub>3</sub>                | 3.86     | -0.452                     | <i>Cryptosporella femoralis</i>                        |
| P       | Hirsutatin A                                                     | 677.3756 [M+H] <sup>+</sup> | C <sub>34</sub> H <sub>52</sub> N <sub>4</sub> O <sub>10</sub> | 4.53     | -0.104                     | <i>Xylaria ellisii</i>                                 |
| Q       | Trienylfuranone A/B                                              | 179.1067 [M+H] <sup>+</sup> | C <sub>11</sub> H <sub>14</sub> O <sub>2</sub>                 | 2.93     | -0.091                     | <i>Hypomontagnella submonticulosa</i>                  |
|         | Trienylfuranol A                                                 | 181.1223 [M+H] <sup>+</sup> | C <sub>11</sub> H <sub>16</sub> O <sub>2</sub>                 | 3.73     | 0.131                      | <i>Hypomontagnella submonticulosa</i>                  |
| R       | LL P880 beta (fungal lactone) <sup>a</sup>                       | 231.1228 [M+H] <sup>+</sup> | C <sub>11</sub> H <sub>18</sub> O <sub>5</sub>                 | 3.12     | 0.389                      | <i>Xylaria ellisii</i>                                 |
| S       | Deoxylachnellulone                                               | 309.2059 [M+H] <sup>+</sup> | C <sub>18</sub> H <sub>28</sub> O <sub>4</sub>                 | 4.58     | -0.342                     | <i>Lachnellula calyciformis</i>                        |
|         | Lachnellulone                                                    | 325.2009 [M+H] <sup>+</sup> | C <sub>18</sub> H <sub>28</sub> O <sub>5</sub>                 | 4.22     | -0.063                     | <i>Lachnellula calyciformis</i>                        |

<sup>a</sup>Dereplicated with GNPS Library search function
